# Supplementary material for: Different photosynthetic adaptation of Zoysia spp. under shading: shade avoidance and shade tolerance response
Source: PeerJ. 2022 Oct 25;10:e14274. doi: 10.7717/peerj.14274 (PMC9615966; doi:10.7717/peerj.14274)
Supplement: Supplemental Information 2 [file peerj-10-14274-s002.docx]

Y1 = 0.14 XPlant heights + 0.17 XChl *a* + 0.12 XChl *b* + 0.14 XCaro + 0.10 XChl*a*/Chl*b* + 0.21 XChls/Caro - 0.07 XFo + 0.18 XFm+ 0.29 XφPo + 0.30 XψEo + 0.32 XφEo - 0.28 XABS/RC - 0.24 XTRo/RC + 0.09 XETo/RC - 0.31 XDIo/RC + 0.34 XPIABS + 0.33 XPIcs + 0.30 XPItotal

Y2 = 0.28 XPlant heights + 0.50 XChl *a* + 0.46 XChl *b* + 0.51 XCaro + 0.05 XChl*a*/Chl*b* + 0.21 XChls/Caro - 0.10XFo - 0.15 XFm- 0.06 XφPo - 0.06 XψEo - 0.07XφEo + 0.16 XABS/RC + 0.17 XTRo/RC + 0.10 XETo/RC + 0.13 XDIo/RC - 0.11 XPIABS - 0.10 XPIcs -0.10 XPItotal

Y3 = 0.13 XPlant heights - 0.03 XChl *a* - 0.24 XChl *b* - 0.03 XCaro + 0.40 XChl*a*/Chl*b* - 0.13 XChls/Caro + 0.18 XFo + 0.18 XFm + 0.01 XφPo + 0.24 XψEo+ 0.21 XφEo + 0.31 XABS/RC + 0.36 XTRo/RC+ 0.55 XETo/RC + 0.18 XDIo/RC+ 0.05 XPIABS+ 0.11 XPIcs -0.11 XPItotal

Y4 = 0.34 XPlant heights + 0.08 XChl *a*- 0.02 XChl *b* + 0.13 XCaro + 0.22 XChl*a*/Chl*b* - 0.15 XChls/Caro + 0.63 XFo + 0.45 XFm- 0.07 XφPo - 0.16 XψEo - 0.15 XφEo - 0.13 XABS/RC - 0.16 XTRo/RC - 0.28 XETo/RC - 0.08 XDIo/RC - 0.10 XPIABS - 0.05 XPIcs - 0.03 XPItotal

Y5 = -0.30 XPlant heights - 0.04 XChl *a* + 0.27 XChl *b* - 0.07 XCaro - 0.56 XChl*a*/Chl*b* + 0.34 XChls/Caro + 0.41 XFo + 0.33 XFm- 0.12 XφPo + 0.11 XψEo+ 0.07 XφEo + 0.11 XABS/RC + 0.10 XTRo/RC + 0.20 XETo/RC + 0.14 XDIo/RC -0.01 XPIABS + 0.03 XPIcs+ 0.11 XPItotal
