# Supplementary material for: Different photosynthetic adaptation of Zoysia spp. under shading: shade avoidance and shade tolerance response
Source: PeerJ journal article supplement (doi:10.7717/peerj.14274), 2022-10-25
Supplement: supplemental_files.zip [file supplemental_files.zip]

## Sheet: Sheet1
Accessions	light												shade
	A663				A645				A440				A663				A645				A440
	1	2	3	4	1	2	3	4	1	2	3	4	1	2	3	4	1	2	3	4	1	2	3	4
Nanling	0.629	0.532	0.648	0.62	0.173	0.148	0.178	0.168	0.985	0.85	1.013	0.996	0.890	0.856	0.879	0.913	0.248	0.242	0.246	0.256	1.358	1.295	1.323	1.401
WZGF8	0.581	0.566	0.608	0.616	0.164	0.162	0.172	0.176	0.918	0.903	0.964	0.979	0.875	0.887	0.713	0.874	0.242	0.249	0.197	0.247	1.3	1.327	1.327	1.332
WZG91	0.564	0.564	0.591	0.641	0.155	0.162	0.164	0.178	0.884	0.869	0.924	1.010	0.748	0.779	0.866	0.736	0.208	0.215	0.243	0.201	1.117	1.158	1.301	1.100
WZG99	0.629	0.522	0.693	0.633	0.167	0.151	0.185	0.166	0.969	0.734	0.734	0.951	0.897	0.932	0.873	0.887	0.245	0.228	0.242	0.242	1.312	1.228	1.298	1.307
WZG59	0.255	0.249	0.233	0.209	0.066	0.066	0.062	0.058	0.430	0.438	0.396	0.362	0.497	0.498	0.502	0.481	0.131	0.129	0.133	0.124	0.749	0.752	0.765	0.740
Manila	0.557	0.540	0.551	0.572	0.156	0.159	0.161	0.160	0.895	0.833	0.889	0.921	0.680	0.668	0.651	0.626	0.190	0.186	0.179	0.177	1.035	1.016	0.987	0.958
ZG45	0.632	0.711	0.680	0.583	0.174	0.196	0.186	0.160	0.973	1.106	1.055	0.911	0.822	0.737	0.806	0.781	0.226	0.201	0.220	0.210	1.239	1.108	1.217	1.185
ZG48	0.399	0.424	0.447	0.425	0.116	0.120	0.130	0.123	0.652	0.699	0.725	0.721	0.513	0.535	0.613	0.601	0.141	0.145	0.170	0.164	0.781	0.820	0.932	0.921
ZG31	0.597	0.529	0.586	0.550	0.168	0.146	0.165	0.151	0.961	0.844	0.934	0.871	0.750	0.807	0.774	0.712	0.212	0.227	0.217	0.201	1.141	1.235	1.187	1.088
WZG85	0.467	0.411	0.408	0.450	0.137	0.115	0.114	0.127	0.766	0.685	0.673	0.737	0.702	0.683	0.683	0.686	0.191	0.186	0.189	0.185	1.055	1.038	1.037	1.033
WZG55	0.484	0.519	0.493	0.526	0.135	0.145	0.138	0.145	0.771	0.820	0.788	0.847	0.822	0.763	0.743	0.745	0.228	0.219	0.205	0.205	1.254	1.164	1.121	1.136
WZG97	0.389	0.383	0.356	0.434	0.109	0.112	0.104	0.121	0.636	0.635	0.587	0.715	0.728	0.800	0.799	0.778	0.206	0.222	0.221	0.214	1.094	1.213	1.218	1.176
ZG-3	0.716	0.640	0.662	0.592	0.187	0.165	0.173	0.160	1.105	0.986	1.022	0.955	0.659	0.668	0.575	0.692	0.171	0.175	0.149	0.185	0.992	1.025	0.872	1.055
Wuhao-1	0.711	0.680	0.694	0.730	0.194	0.184	0.190	0.197	1.115	1.069	1.102	1.143	0.904	0.912	0.941	1.032	0.253	0.255	0.263	0.294	1.388	1.381	1.431	1.572
ZG63	0.509	0.550	0.554	0.581	0.137	0.151	.155	0.160	0.803	0.862	0.863	0.918	0.490	0.528	0.507	0.512	0.137	0.143	0.139	0.138	0.742	0.802	0.811	0.777
ZG64	0.543	0.479	0.545	0.583	0.142	0.127	0.142	0.157	0.845	0.754	0.856	0.926	0.563	0.535	0.573	0.649	0.147	0.143	0.149	0.170	0.867	0.837	0.886	0.981
ZG65	0.455	0.445	0.392	0.423	0.125	0.122	0.105	0.114	0.742	0.727	0.637	0.693	0.549	0.536	0.525	0.562	0.145	0.142	0.143	0.147	0.838	0.820	0.805	0.855
ZG66	0.41	0.547	0.515	0.462	0.119	0.15	0.146	0.133	0.645	0.863	0.811	0.739	0.747	0.74	0.638	0.701	0.197	0.202	0.169	0.187	1.111	1.103	0.953	1.045
ZG67	0.469	0.475	0.440	0.447	0.127	0.131	0.130	0.122	0.736	0.752	0.698	0.711	0.755	0.808	0.764	0.809	0.206	0.219	0.206	0.220	1.107	1.193	1.121	1.196
